# Supplementary material
Source: Springer Nature journal article supplement (https://www.springermedizin.de/resource/supplementary/12865_2010_364_MOESM5_ESM.pdf/9427840)

A

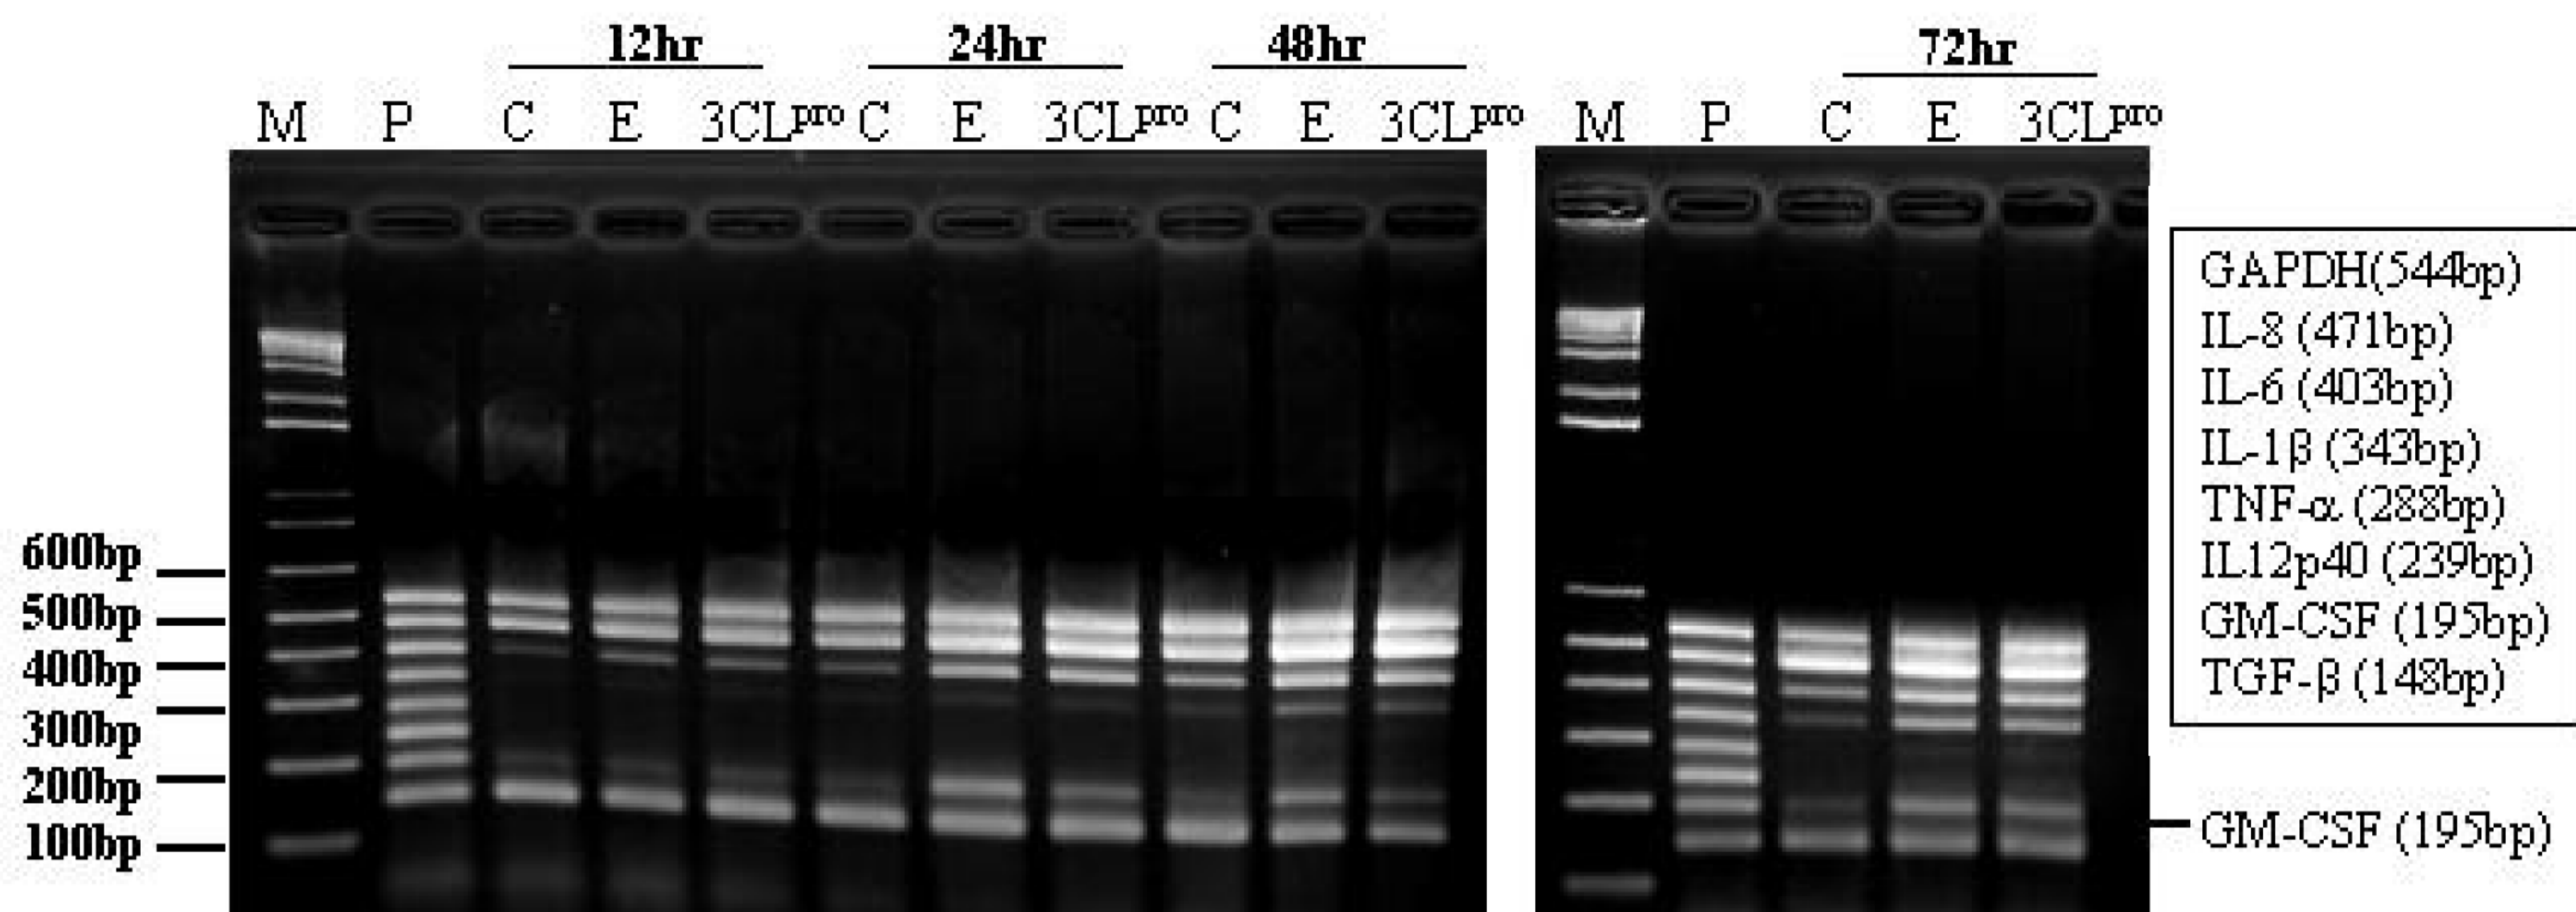

B

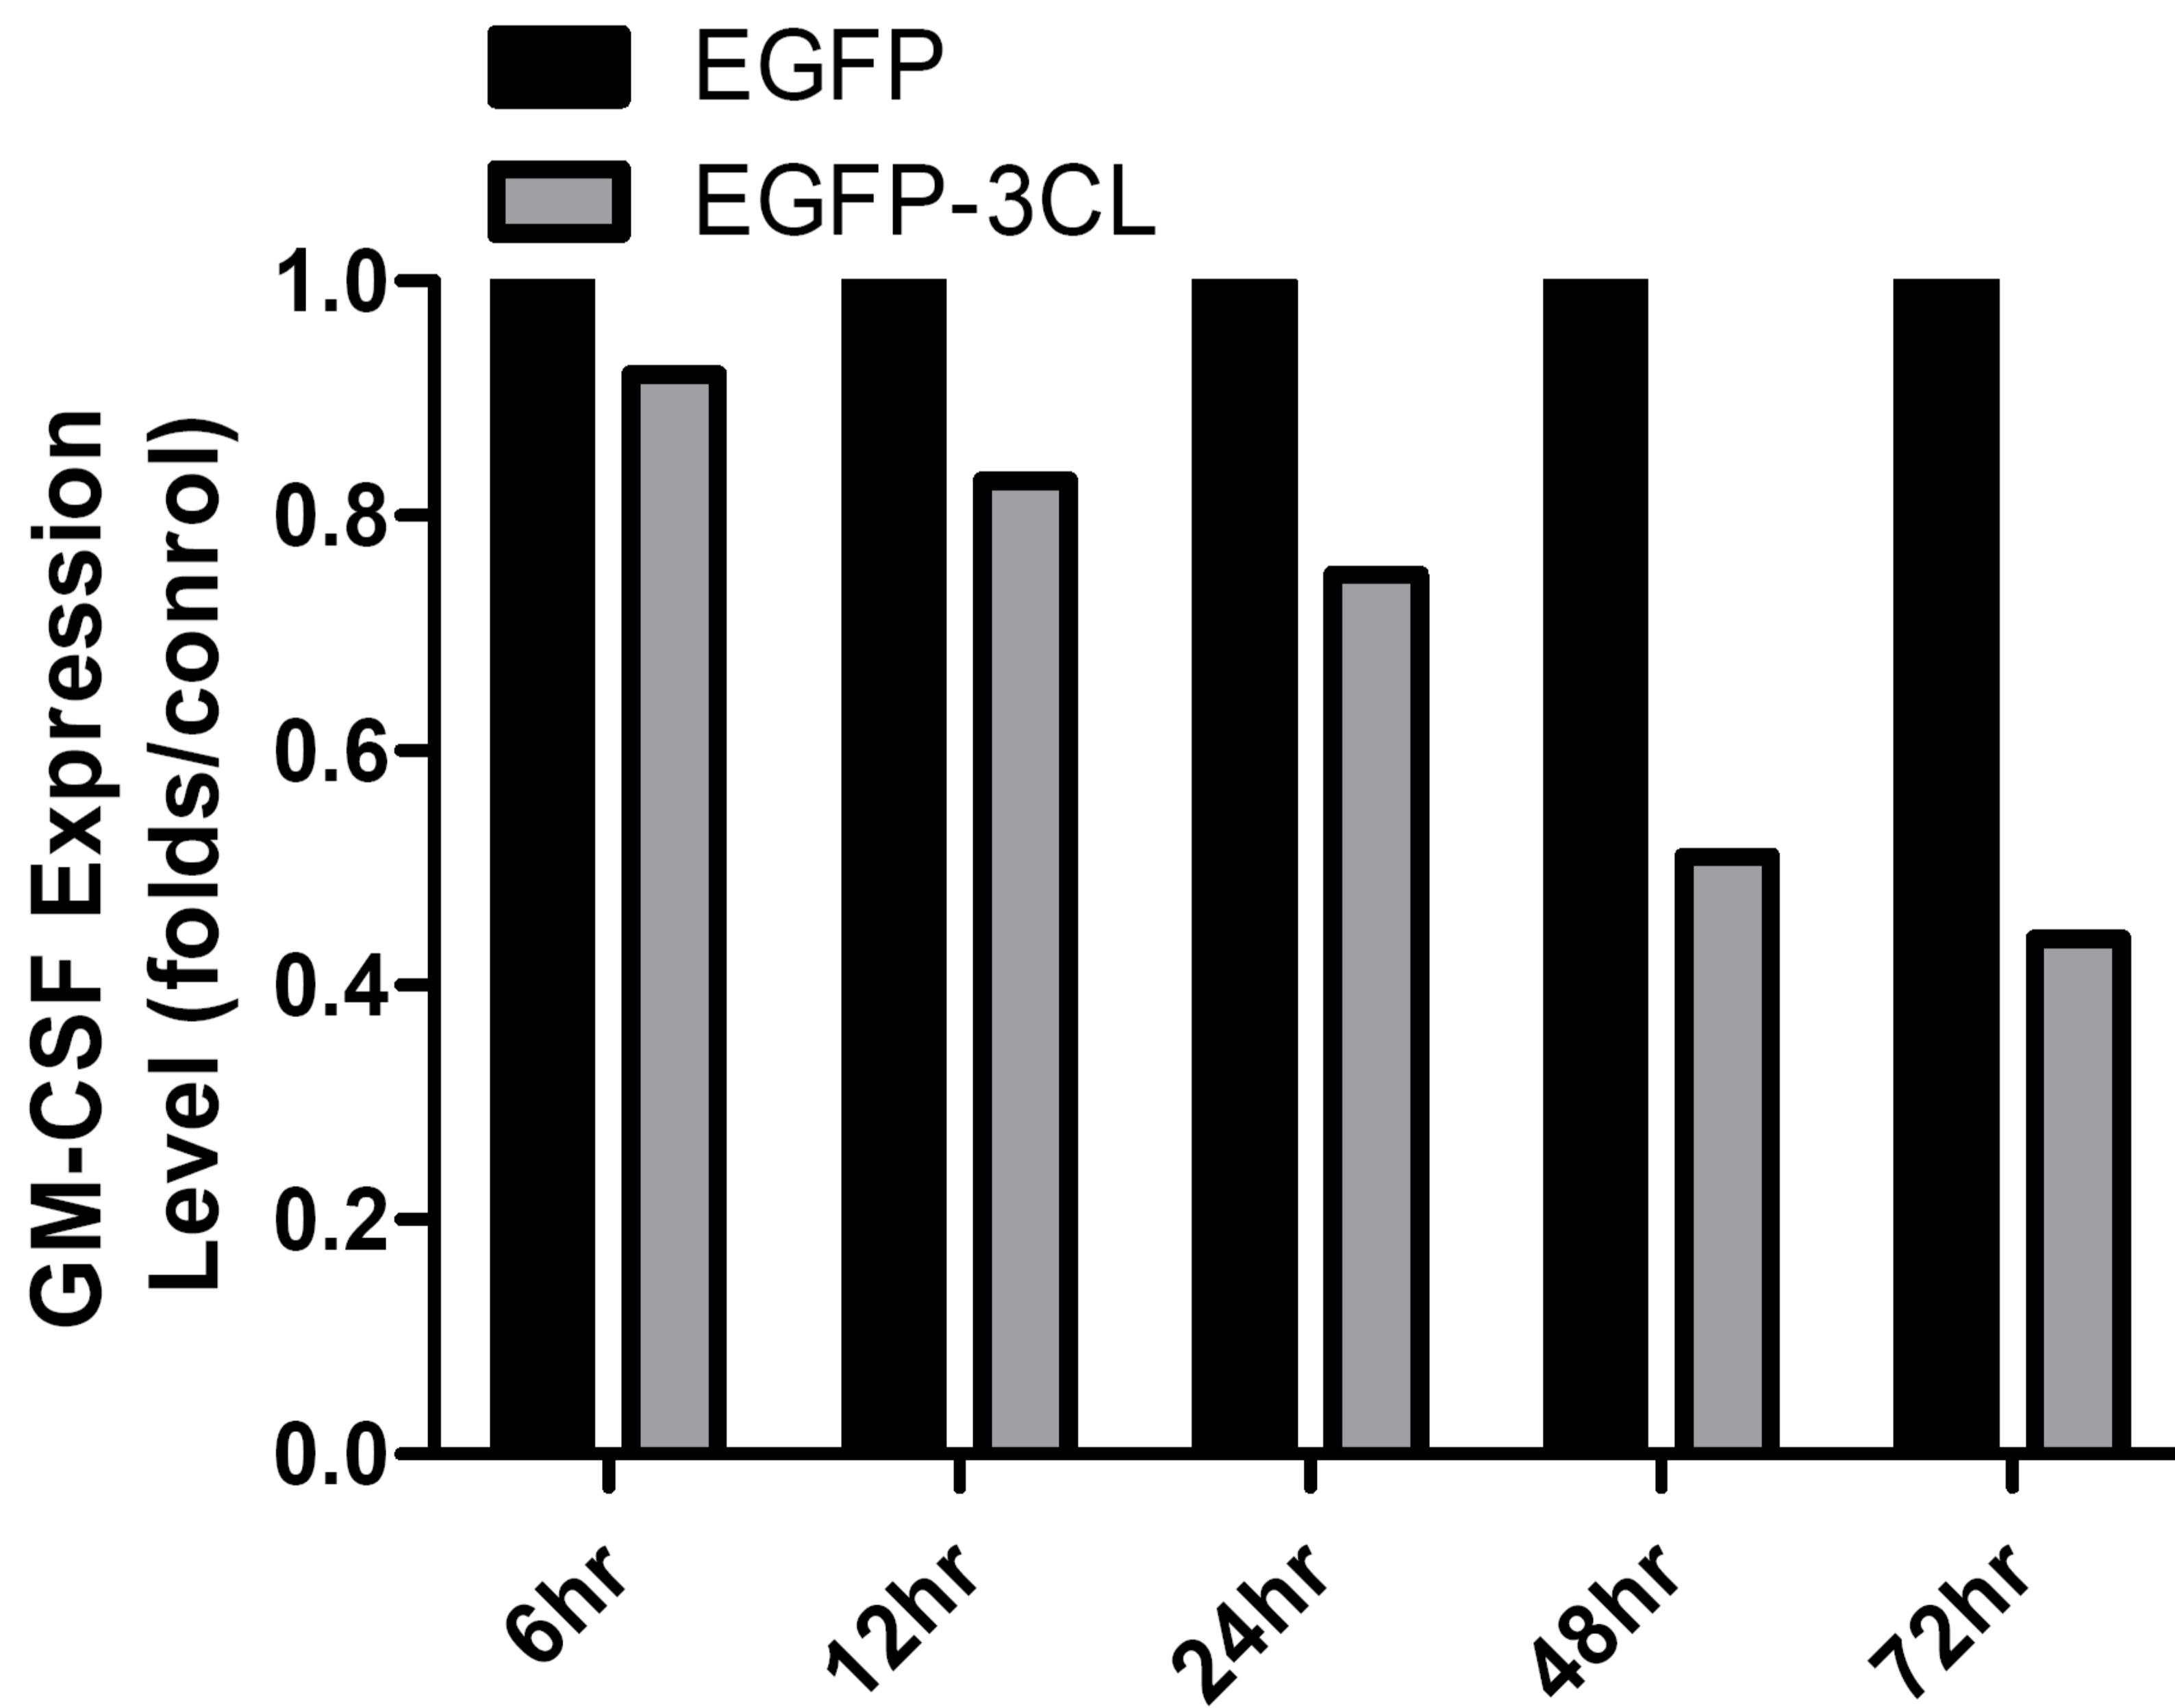

Supplement: MOESM5 [file 9427840]
